# Supplementary material for: Extreme weather exacerbates ozone pollution in the Pearl River Delta, China: role of natural processes
Source: Copernicus journal article supplement (doi:10.5194/acp-24-1559-2024), 2024-02-01
Supplement: Supplementary file 1 [file acp-24-1559-2024-supplement.pdf]

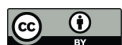

*Supplement of*

## **Extreme weather exacerbates ozone pollution in the Pearl River Delta, China: role of natural processes**

**Nan Wang et al.**

*Correspondence to:* Xiaopu Lyu ([xiaopu\\_lyu@hkbu.edu.hk](mailto:xiaopu_lyu@hkbu.edu.hk)) and Fumo Yang ([fmyang@scu.edu.cn](mailto:fmyang@scu.edu.cn))

The copyright of individual parts of the supplement might differ from the article licence.

## **Supporting Information**

Supporting Information includes 14 pages, 11 figures and 4 tables

SI Figures S1-S11

SI Tables S1-S4

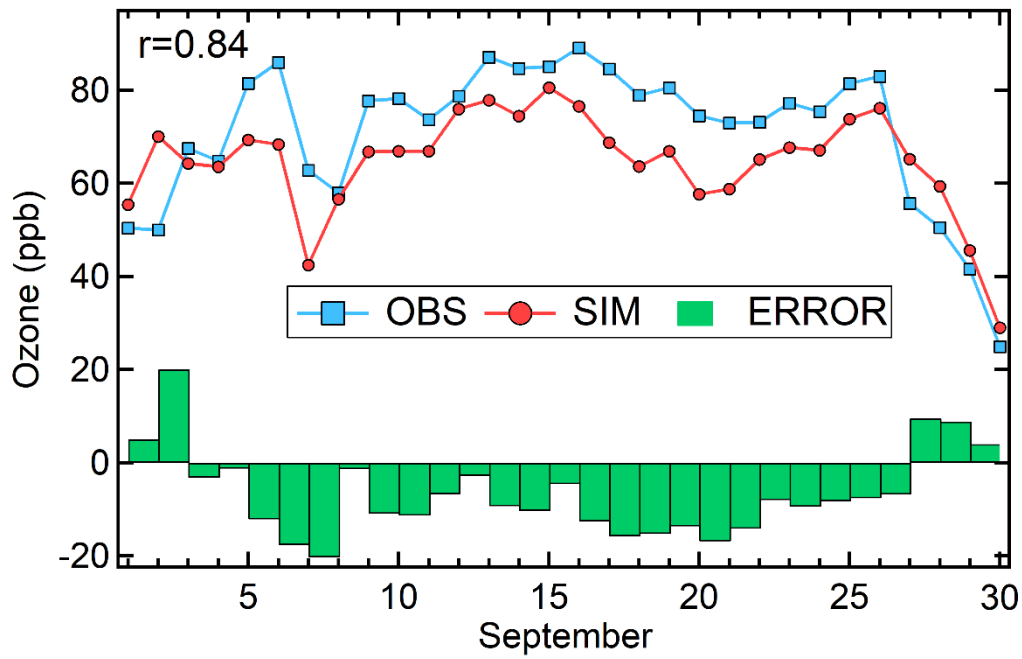

Figure S1 Validation of the stepwise regression model

## Monthly Comparison

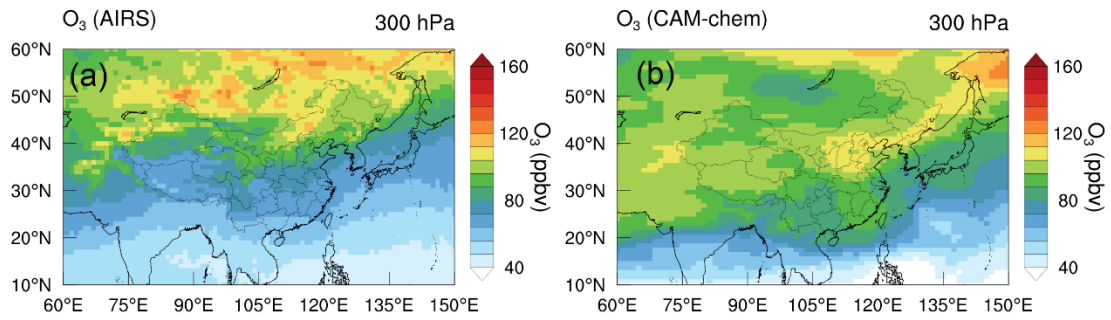

## Comparisons on Sep. 15 2022

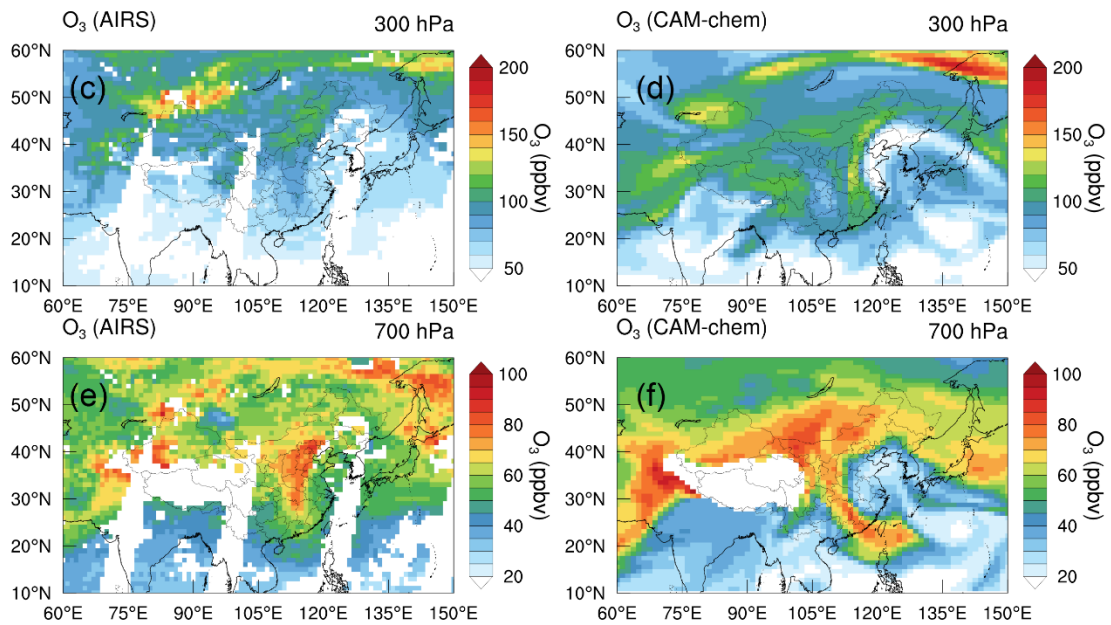

Figure S2 Comparisons of CAM-Chem simulated O<sub>3</sub> and satellite retrieved O<sub>3</sub> from AIRS. (a) and (b) distribution of monthly averaged O<sub>3</sub> levels at 300hpa; (c) and (d) distribution of 300 hpa O<sub>3</sub> levels on Sep. 15 2022 (illustrating the STE event); (e) and (f) same as (c) and (d) but at 700 hpa.

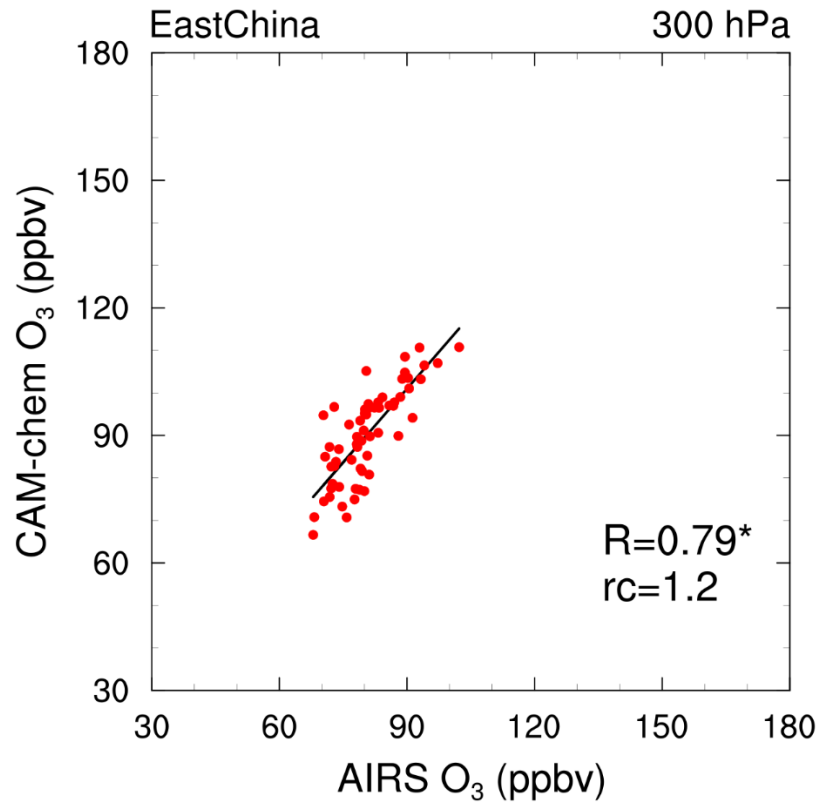

Figure. S3 Validation of AIRS O<sub>3</sub> and CAM-Chem simulated O<sub>3</sub> at 300hPa in Eastern China (R indicates correlation coefficient; rc indicates regression coefficient)

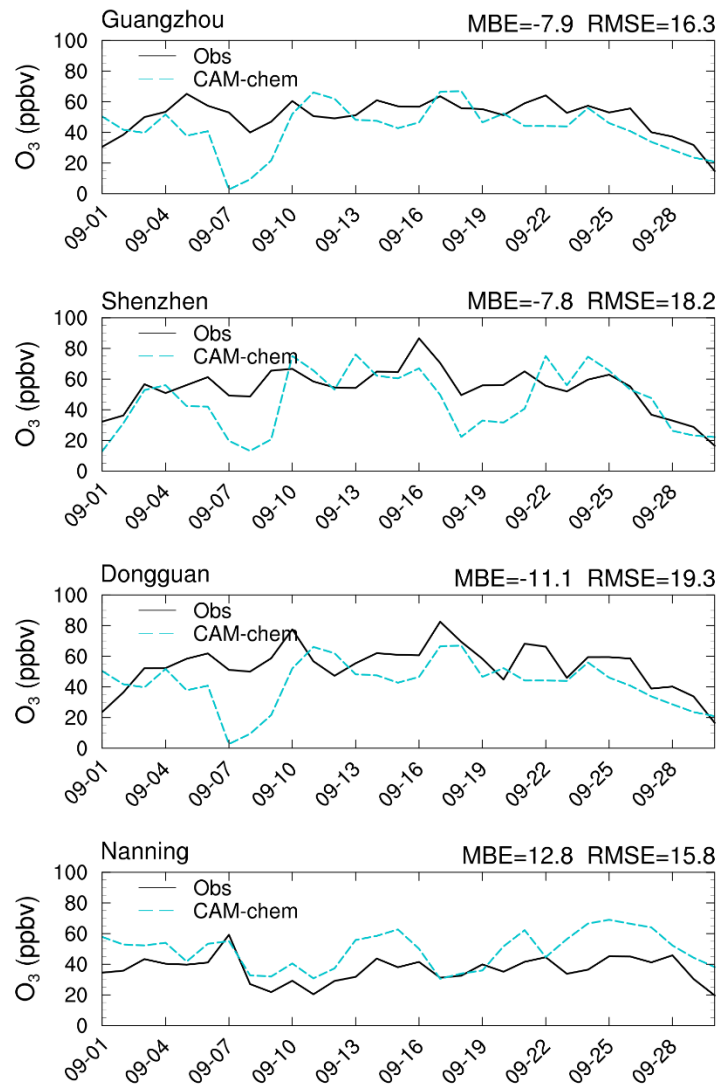

Figure S4 Comparisons of the CAM-Chem performance with surface monitoring O<sub>3</sub> concentrations (MBE stands for mean bias error and RMSE stands for root mean square error. Obs refers to data from observations and CAM-Chem refers to the model simulated result.)

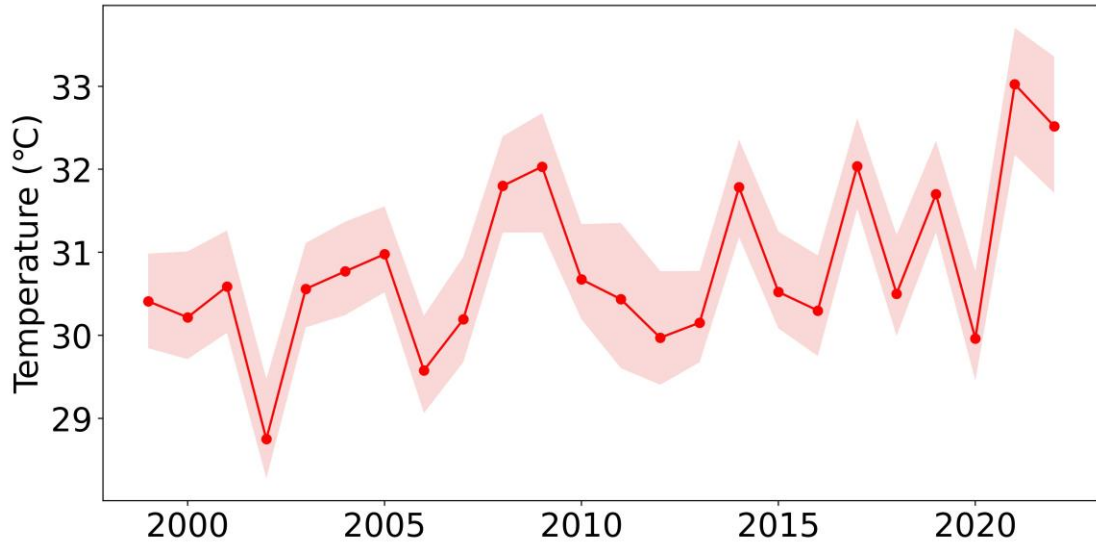

Figure S5 Historical variation of monthly average daily-maximum temperature in PRD in September from 1999 to 2022

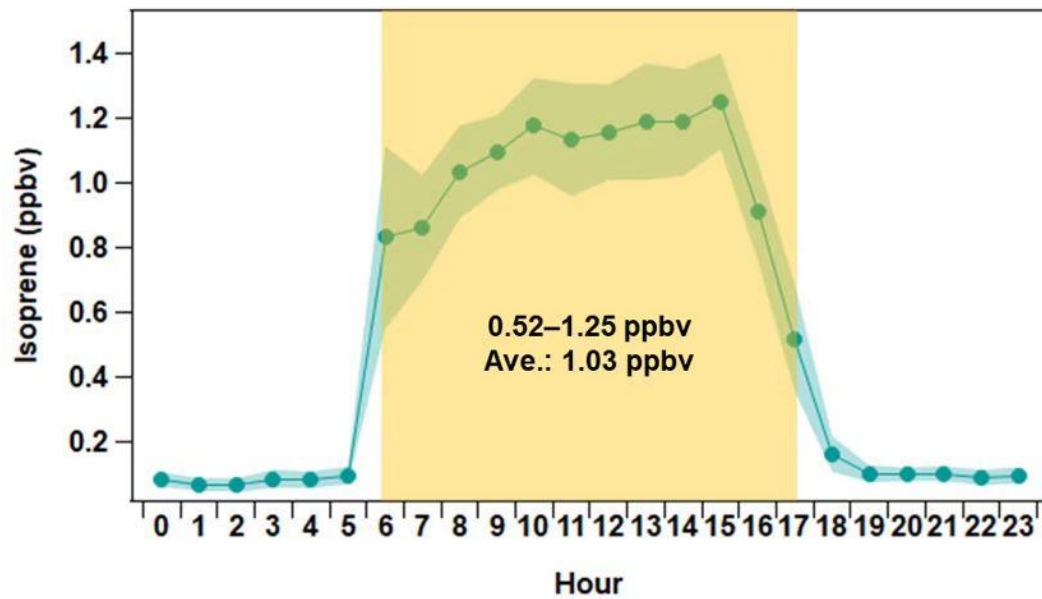

Figure S6 Diurnal variation of isoprene concentrations at HZ Base. (The yellow shaded highlights the daytime averaged concentrations, 0.51-1.25 ppbv. The daily averaged concentration was 1.03 ppbv.)

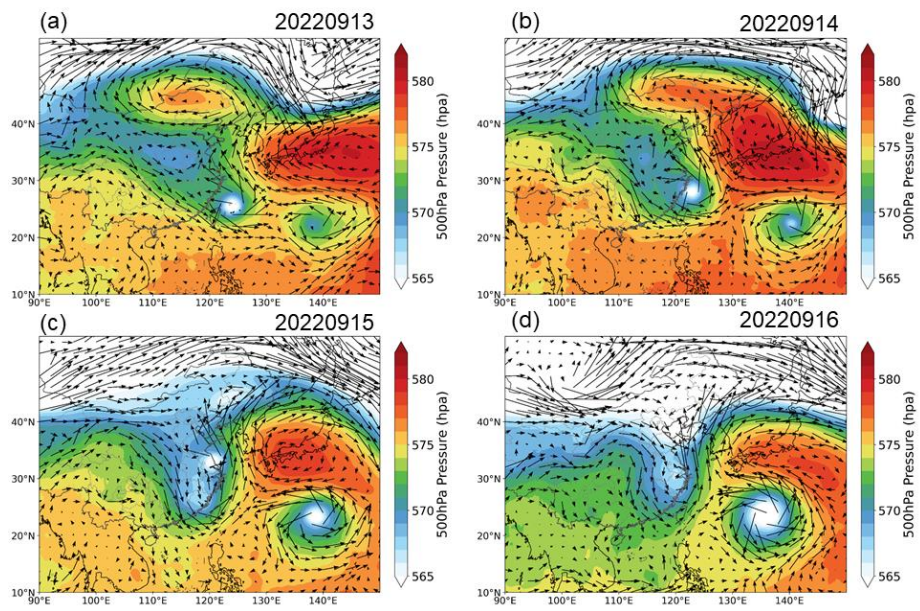

Figure S7 Synoptic weather from September 13 to September 16 2022



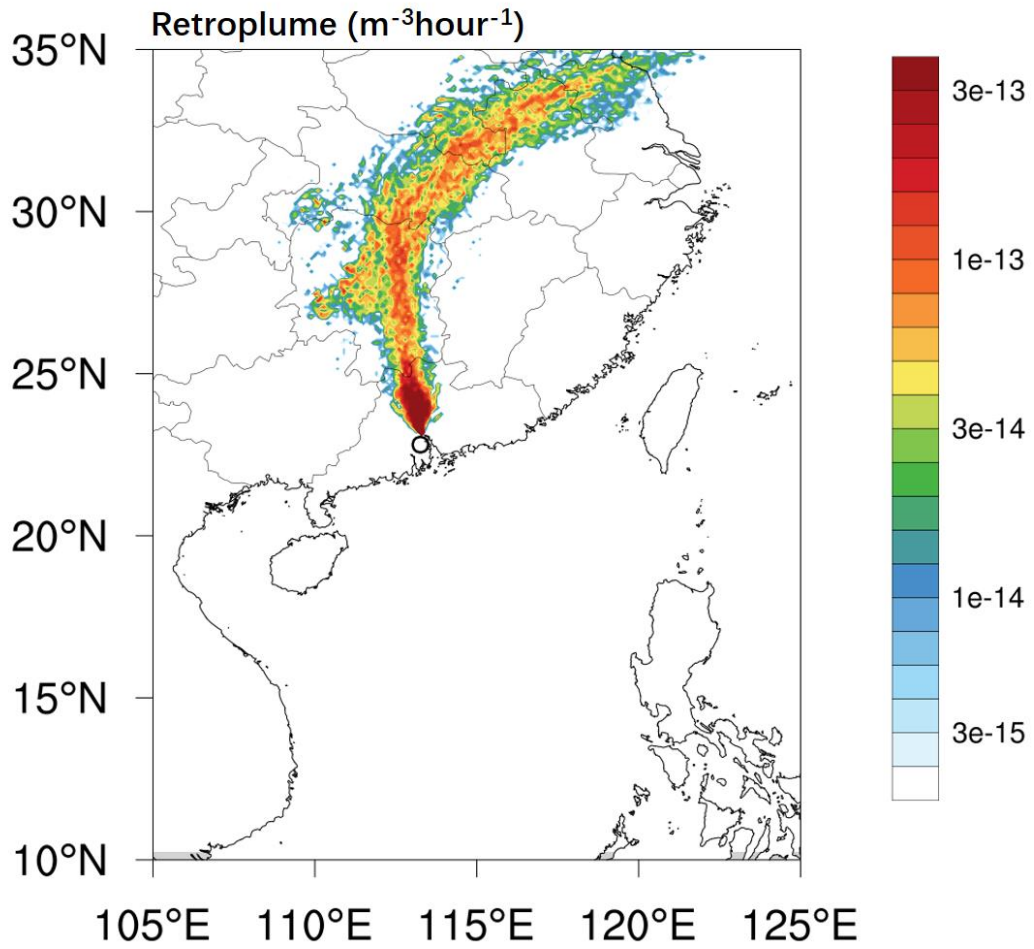

Figure S8 LPDM simulated 48h retroplume (footprint residence time) showing transport pathways of air masses impacting PRD

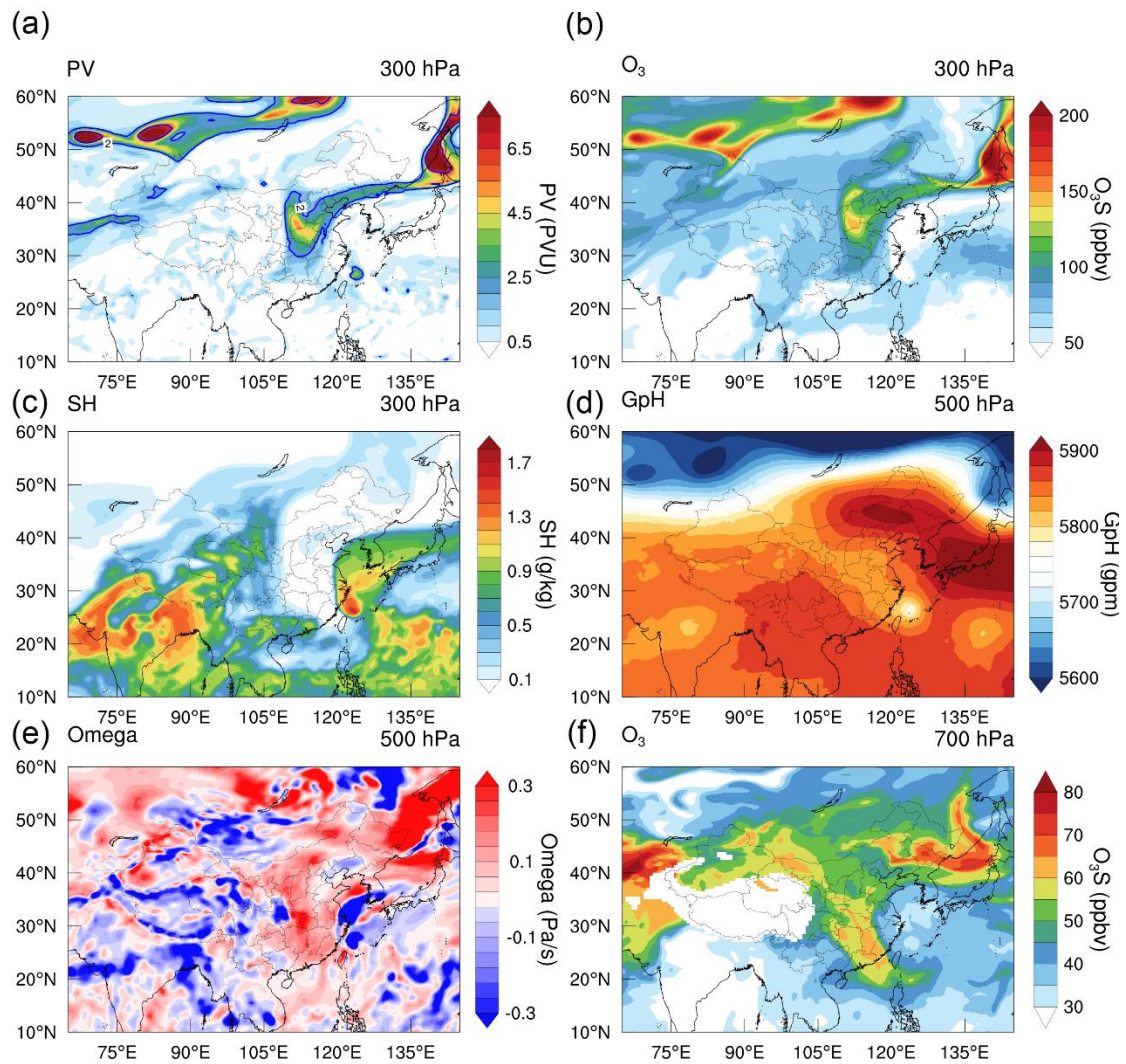

Figure S9 Evidence illustrating STE O<sub>3</sub> intrusion on September 13, 2022. (a) Spatial distribution of potential vorticity (PV) at 300hPa over China (The blue solid line indicates the dynamical tropopause of 2PVU, 1 PVU= $10^{-6} \text{ m}^2 \text{ s}^{-1} \text{ K kg}^{-1}$ ); (b-e) The distribution of O<sub>3</sub> concentration (at 300 hPa), specific humidity (at 300 hPa, SH), geopotential height (at 500 hPa, GpH), vertical velocity (at 500 hPa, Omega), and O<sub>3</sub> concentration (at 700 hPa), respectively. All the data were identified based on ERA5 database.

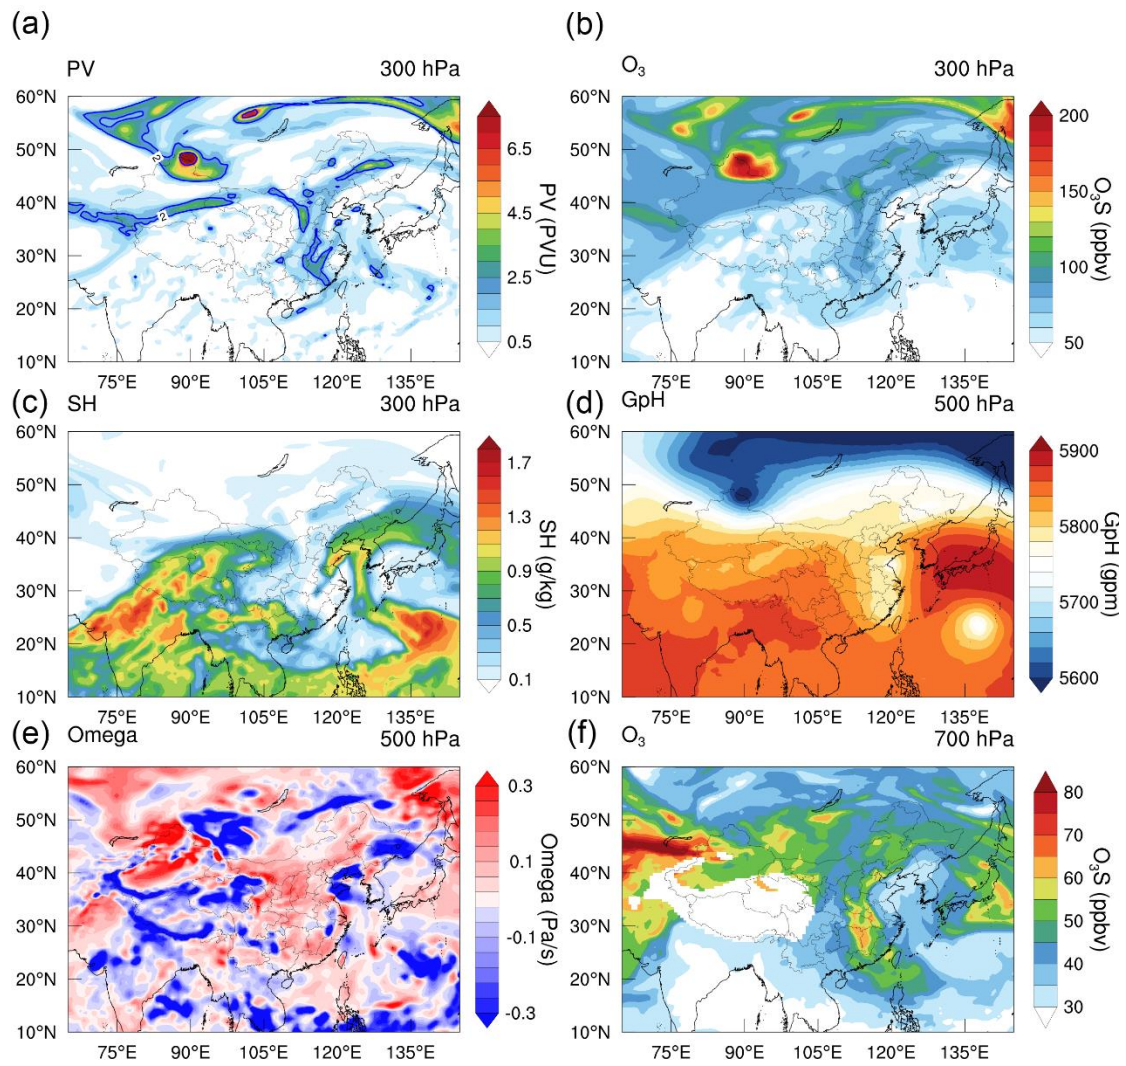

Figure S10 Same as Fig S9 but on September 15

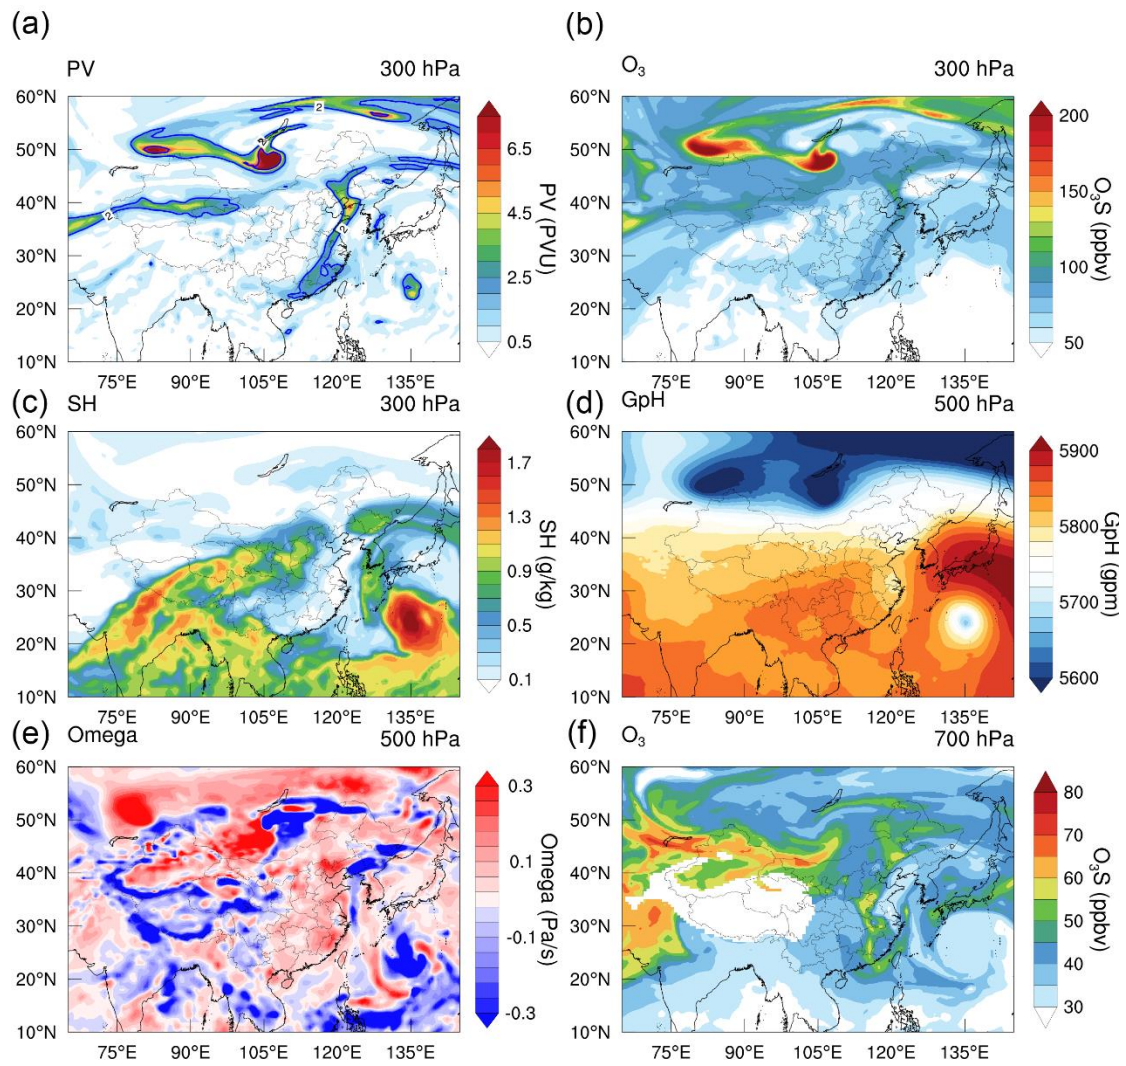

Figure S11 Same as Fig S9 but on September 16

Table S1 Introduction of monitoring instruments used in this work

| Parameter       | Manufacture       | Model       | Resolution |
|-----------------|-------------------|-------------|------------|
| O <sub>3</sub>  | Thermo Scientific | 49i-D1NAA   | 5min       |
| NO <sub>x</sub> | Thermo Scientific | 42i-DNMSDAA | 5min       |
| CO              | Thermo Scientific | 48i-DNSAA   | 5min       |
| SO <sub>2</sub> | Thermo Scientific | 43i-DNSAA   | 5min       |
| VOC             | AMA, Germany      | GC5000-FID  | 1h         |

Table S2 Configuration and settings of WRF-CMAQ modeling system

| Item                        | Scheme                                                                          |
|-----------------------------|---------------------------------------------------------------------------------|
| Grid resolution             | 12×12 km                                                                        |
| Initial/boundary conditions | WRF: NCEP FNL reanalysis data<br>CMAQ: Mother domain (36k×36km grid resolution) |
| Microphysics                | WRF single-moment 5-class microphysics                                          |
| Short-wave radiation        | Goddard                                                                         |
| Long-Wave radiation         | RRTM                                                                            |
| WRF nudging                 | Yes                                                                             |
| Boundary Layer              | ACM2                                                                            |
| Gas-phase Chemistry         | CB05                                                                            |
| Aerosol option              | AERO5                                                                           |
| Dry deposition              | M3DRY                                                                           |
| Anthropogenic emissions     | MEIC                                                                            |
| Natural emissions           | MEGAN                                                                           |

Table S3 WRF-CMAQ Model performance of O<sub>3</sub>, and NO<sub>2</sub> in Guangzhou

| Variables | O <sub>3</sub> (ppb)* | NO <sub>2</sub> (ppb)* |
|-----------|-----------------------|------------------------|
| MB        | -8.08                 | 1.76                   |
| NME       | -0.28                 | 0.11                   |
| RMSE      | 27.74                 | 9.42                   |
| IOA       | 0.74                  | 0.72                   |

\*The WRF-CMAQ simulated O<sub>3</sub> and NO<sub>2</sub> were validated with observed O<sub>3</sub> and NO<sub>2</sub> in Guangzhou using statistical metrics (MB stands for mean bias, NME stands for normalized mean bias, RMSE stands for root mean square error and IOA stands for index of agreement)

Table S4 The recorded tropical cyclones influencing PRD in September 2022

| Name      | Start time | End time | Max intensity |
|-----------|------------|----------|---------------|
| Hinnamnor | Aug 27     | Sept 8   | SuperTY*      |
| Muifa     | Sept 6     | Sept 16  | STY**         |
| Nanmadol  | Sept 12    | Sept 20  | SuperTY       |
| Noru      | Sept 21    | Sept 29  | SuperTY       |

\*SuperTY refers to super typhoon

\*\*STY refers to severe typhoon. The classification was based on China Grade of tropical cyclones (GB/T 19201-2006)
